# Supplementary material
Source: publisher figshare collection journal article supplement (https://gsapubs.figshare.com/articles/dataset/_/20097089)
Supplement: Supplementary file 1 [file 1]

## Sheet: Table 3
Supplemental Table 3. Normalized Pollen Percentages in Combined Set of Naples Samples
														Formation	Member
Sample #	Height above base of section (m)	Nw Ma	Pinus	Cupressaceae	Quercus	Alnus	Juglans	Chaparral	Asteraceae	Amaranthaceae	Poaceae	Locally Extinct	Total Counted
KG12	515	6	46.9388	3.40136	8.84354	1.36054	3.06122	5.44218	19.7279	9.52381	1.70068	2.72109	156	Sisquoc
P48	373	7.32326	35.8621	1.37931	4.82759	1.37931	5.51724	0	17.931	21.3793	8.27586	3.44828	155	Moneterey	Clayey Siliceous
P46	361	7.60233	72.4638	0	0.724638	0	9.42029	0	13.0435	0.724638	3.62319	0	150	Moneterey	Clayey Siliceous
KG7	354	7.76512	38.3838	14.1414	22.2222	0	2.0202	6.06061	11.1111	4.0404	2.0202	2.0202	115	Moneterey	Upper Calcareous-Siliceous
P43	334	8.23023	69.3431	0.729927	3.64964	0	0.729927	0	13.8686	5.83942	5.10949	0.729927	147	Moneterey	Upper Calcareous-Siliceous
KG5	324	8.46279	75.7895	13.6842	1.05263	0	0	2.10526	3.15789	2.10526	2.10526	1.05263	109	Moneterey	Upper Calcareous-Siliceous
P41	315	8.67209	81.1321	0	2.64151	0.754717	1.88679	0	5.28302	3.77358	3.39623	1.13208	285	Moneterey	Upper Calcareous-Siliceous
P38	288	9.3	59.6708	0.823045	13.5802	1.64609	2.88066	0.411523	9.46502	6.99588	4.11523	0.411523	262	Moneterey	Upper Calcareous-Siliceous
KG30	280	10.1	38.1818	13.6364	15.4545	1.81818	2.72727	17.2727	7.27273	1.81818	1.81818	0.909091	126	Moneterey	Upper Calcareous-Siliceous
KG31	276	10.5	13.8889	23.1481	38.8889	1.85185	4.62963	3.7037	5.55556	4.62963	3.7037	4.62963	138	Moneterey	Carbonaceous Marl
KG1	257	12.4	63.8889	7.40741	17.5926	0.925926	0.925926	3.7037	0	3.7037	1.85185	3.7037	120	Moneterey	Carbonaceous Marl
KG33	255	12.6	53.1915	8.51064	8.51064	0	4.25532	10.6383	10.6383	4.25532	0	14.8936	221	Moneterey	Carbonaceous Marl
P33	252	12.9	54.7264	0.497512	3.48259	0	10.9453	0.497512	12.9353	9.45274	4.97512	2.48756	58	Moneterey	Carbonaceous Marl
KG32	241	13.2639	32.0988	18.5185	18.5185	3.7037	0	13.5802	11.1111	1.23457	1.23457	1.23457	81	Moneterey	Carbonaceous Marl
P32	238	13.343	8.74317	1.63934	12.0219	0.546448	15.847	3.82514	16.3934	19.6721	12.5683	8.74317	195	Moneterey	Carbonaceous Marl
P18	224	13.7124	9	0	16	1	5	0	21	19	21	8	253	Moneterey	Lower Calcareous-Siliceous
P17	218	13.8707	26.3374	0.411523	6.17284	1.23457	20.5761	0.823045	7.40741	11.5226	10.6996	14.8148	208	Moneterey	Lower Calcareous-Siliceous
KG34	205	14.2137	35.3082	4.94315	15.5356	0.706165	0.706165	5.64932	4.94315	0	0	16.2418	119	Moneterey	Lower Calcareous-Siliceous
KG41	185	14.7414	58.2781	0.662252	29.1391	0	1.3245	9.27152	1.3245	0	0	7.94702	82	Moneterey	Lower Calcareous-Siliceous
P13	180	14.8368	3.0303	0.606061	7.27273	0	23.6364	0	20.6061	30.303	6.06061	8.48485	216	Moneterey	Lower Calcareous-Siliceous
KG39	107	16.3077	17.9104	19.403	20.8955	1.49254	7.46269	10.4478	2.98507	16.4179	2.98507	22.3881	95	Moneterey	Lower Calcareous-Siliceous
KG38	97	17.347	29.3233	15.0376	24.0602	0.75188	5.26316	9.77444	7.5188	5.26316	3.00752	3.00752	157	Moneterey	Lower Calcareous-Siliceous
KG11	86	17.4208	46.2121	9.84848	29.5455	0.757576	2.27273	3.78788	3.0303	3.78788	0.757576	23.4848	176	Moneterey	Lower Calcareous-Siliceous
KG10	86	17.4208	54.2553	11.7021	24.4681	1.06383	3.19149	2.12766	0	3.19149	0	14.8936	119	Moneterey	Lower Calcareous-Siliceous
KG36	84	17.4342	45.3608	7.21649	28.866	0	1.03093	8.24742	4.12371	4.12371	1.03093	9.27835	113	Moneterey	Lower Calcareous-Siliceous
KG35	71	17.5215	48.4536	11.3402	20.6186	1.03093	2.06186	6.18557	6.18557	1.03093	3.09278	8.24742	116	Moneterey	Lower Calcareous-Siliceous
P23	49	17.6691	12.7389	1.91083	9.55414	0.636943	14.6497	1.27389	16.5605	13.3758	6.36943	22.9299	102	Moneterey	Lower Calcareous-Siliceous
KG9	-47	18.3134	49.5327	13.0841	21.4953	1.86916	6.54206	3.73832	0.934579	2.80374	0	25.2336	148	Rincon

## Sheet: Info
This Supplemental Material accompanies Heusser, L.E., Barron, J.A., Blake, G.H., and Nichols, J.,
2022, Miocene terrestrial paleoclimates inferred from pollen in the Monterey Formation, Naples
Coastal Bluffs section, California, in Aiello, I., Barron, J., and Ravelo, C., eds., Understanding
the Monterey Formation and Similar Biosiliceous Units across Space and Time: Geological
Society of America Special Paper 556, https://doi.org/10.1130/2022.2556(09).
